# Supplementary material for: Dabrafenib; Preclinical Characterization, Increased Efficacy when Combined with Trametinib, while BRAF/MEK Tool Combination Reduced Skin Lesions
Source: PubMed Central journal article supplement (PMC3701070; doi:10.1371/journal.pone.0067583), 2013-07-03
Supplement: pone.0067583.s004.pdf [file pone.0067583.s004.pdf]

| <b>KINASE</b> | <b>IC<sub>50</sub> (nM)</b> |
|---------------|-----------------------------|
| BRAF          | 3.2                         |
| CRAF          | 5.0                         |
| BRK (h)       | 79                          |
| CK1 (y)       | 41                          |
| LIMK1 (h)     | 15                          |
| NEK11 (h)     | 20                          |
| PKD2 (h)      | 57                          |
| SIK (h)       | 27                          |
| ALK5 (h)*     | 11                          |
