# Supplementary material for: Dabrafenib; Preclinical Characterization, Increased Efficacy when Combined with Trametinib, while BRAF/MEK Tool Combination Reduced Skin Lesions
Source: PubMed Central journal article supplement (PMC3701070; doi:10.1371/journal.pone.0067583), 2013-07-03
Supplement: pone.0067583.s005.pdf [file pone.0067583.s005.pdf]

| CELL LINE  | RAF              | RAS         | gC <sub>50</sub> (nM) | CELL LINE      | RAF | RAS | gC <sub>50</sub> (nM) | CELL LINE     | RAF | RAS | gC <sub>50</sub> (nM) |
|------------|------------------|-------------|-----------------------|----------------|-----|-----|-----------------------|---------------|-----|-----|-----------------------|
| MALME-3M   | BRAF(V600E)      | WT          | 1                     | 647-V          | WT  | WT  | 10000                 | NCI-H226      | WT  | WT  | 10000                 |
| UACC-62    | BRAF(V600E)      | WT          | 1                     | 786-O          | WT  | WT  | 10000                 | NCI-H292      | WT  | WT  | 10000                 |
| C32TG      | BRAF(V600E)      | WT          | 1                     | A172           | WT  | WT  | 10000                 | NCI-H322      | WT  | WT  | 10000                 |
| SK-MEL-1   | BRAF(V600E)      | WT          | 2                     | A204           | WT  | WT  | 10000                 | NCI-H358      | WT  | WT  | 10000                 |
| M14        | BRAF(V600E)      | WT          | 2                     | A427           | WT  | WT  | 10000                 | NCI-H520      | WT  | WT  | 10000                 |
| SK-MEL-28  | BRAF(V600E)      | WT          | 3                     | A431           | WT  | WT  | 10000                 | NCI-H526      | WT  | WT  | 10000                 |
| A375       | BRAF(V600E)      | WT          | 4                     | A2780          | WT  | WT  | 10000                 | NCI-H630      | WT  | WT  | 10000                 |
| DU-4475    | BRAF(V600E)      | WT          | 5                     | ARH-77         | WT  | WT  | 10000                 | NCI-H661      | WT  | WT  | 10000                 |
| UACC-257   | BRAF(V600E)      | WT          | 6                     | Be2/C          | WT  | WT  | 10000                 | NCI-H716      | WT  | WT  | 10000                 |
| Colo 205   | BRAF(V600E)      | WT          | 7                     | BT-20          | WT  | WT  | 10000                 | NCI-H1563     | WT  | WT  | 10000                 |
| SK-MEL-3   | BRAF(V600E)      | WT          | 7                     | BxPc3          | WT  | WT  | 10000                 | NCI-H1792     | WT  | WT  | 10000                 |
| SH-4       | BRAF(V600E)      | WT          | 8                     | C-4.1          | WT  | WT  | 10000                 | NCI-H2030     | WT  | WT  | 10000                 |
| A101D      | BRAF(V600E)      | WT          | 9                     | C33A           | WT  | WT  | 10000                 | NCI-H2052     | WT  | WT  | 10000                 |
| ES-2       | BRAF(V600E)      | WT          | 53                    | CAL-27         | WT  | WT  | 10000                 | NCI-H2122     | WT  | WT  | 10000                 |
| HT-29      | BRAF(V600E)      | WT          | 66                    | CAL-62         | WT  | WT  | 10000                 | NCI-H2228     | WT  | WT  | 10000                 |
| SW1417     | BRAF(V600E)      | WT          | 158                   | Calu-3         | WT  | WT  | 10000                 | CE-19         | WT  | WT  | 10000                 |
| SW872      | BRAF(V600E)      | WT          | 377                   | CaOV3          | WT  | WT  | 10000                 | CE-21         | WT  | WT  | 10000                 |
| RKO        | BRAF(V600E)      | WT          | 2522                  | CGTHW1         | WT  | WT  | 10000                 | CE-33         | WT  | WT  | 10000                 |
| A673       | BRAF(V600E)      | WT          | 10000                 | CHL-1          | WT  | WT  | 10000                 | OVCAR-3       | WT  | WT  | 10000                 |
| GCT        | BRAF(V600E)      | WT          | 10000                 | Colo320DM      | WT  | WT  | 10000                 | OVCAR-4       | WT  | WT  | 10000                 |
|            |                  |             |                       | Colo704        | WT  | WT  | 10000                 | OVCAR-5       | WT  | WT  | 10000                 |
| WM-115     | BRAF(V600D)      | WT          | 5                     | COR-L23        | WT  | WT  | 10000                 | P3HR-1        | WT  | WT  | 10000                 |
| YUMAC      | BRAF(V600K)      | WT          | 5                     | CRO-AP2        | WT  | WT  | 10000                 | PC-3          | WT  | WT  | 10000                 |
| OV-90      | BRAF(del486-490) | WT          | 29                    | Daudi          | WT  | WT  | 10000                 | Raji          | WT  | WT  | 10000                 |
| NCI-H508   | BRAF(G596R)      | WT          | 10000                 | DOTC 24510     | WT  | WT  | 10000                 | RD            | WT  | WT  | 10000                 |
| MDA-MB-231 | BRAF(G464V)      | KRAS(G13D)  | 10000                 | DU-145         | WT  | WT  | 10000                 | RD-ES         | WT  | WT  | 10000                 |
|            |                  |             |                       | EB-3           | WT  | WT  | 10000                 | RL            | WT  | WT  | 10000                 |
| SW756      | WT               | KRAS(G12C)  | 10000                 | EFM-19         | WT  | WT  | 10000                 | SaOS2         | WT  | WT  | 10000                 |
| SW-837     | WT               | KRAS(G12C)  | 10000                 | EKVX           | WT  | WT  | 10000                 | SCC-9         | WT  | WT  | 10000                 |
| UMUC-3     | WT               | KRAS(G12C)  | 10000                 | FaDu           | WT  | WT  | 10000                 | SCC-12        | WT  | WT  | 10000                 |
| LS-174T    | WT               | KRAS(G12D)  | 10000                 | G401           | WT  | WT  | 10000                 | SCC-13        | WT  | WT  | 10000                 |
| A549       | WT               | KRAS(G12S)  | 10000                 | HCC-70         | WT  | WT  | 10000                 | SCC-15        | WT  | WT  | 10000                 |
| SHP-77     | WT               | KRAS(G12V)  | 10000                 | HCC-1954       | WT  | WT  | 10000                 | SCC-25        | WT  | WT  | 10000                 |
| SW480      | WT               | KRAS(G12V)  | 10000                 | HeLa           | WT  | WT  | 10000                 | SCLC-3        | WT  | WT  | 10000                 |
| DLD-1      | WT               | KRAS(G13D)  | 10000                 | Hep3B          | WT  | WT  | 10000                 | SF-268        | WT  | WT  | 10000                 |
| HCT-116    | WT               | KRAS(G13D)  | 10000                 | HMCB           | WT  | WT  | 10000                 | SF-295        | WT  | WT  | 10000                 |
| NCI-H747   | WT               | KRAS(G13D)  | 10000                 | HNS            | WT  | WT  | 10000                 | SJRH30        | WT  | WT  | 10000                 |
| T-84       | WT               | KRAS(G13D)  | 10000                 | HOS            | WT  | WT  | 10000                 | SK-BR-3       | WT  | WT  | 10000                 |
| NCI-H460   | WT               | KRAS(Q61H)  | 10000                 | HPAF-II        | WT  | WT  | 10000                 | SK-LMS-1      | WT  | WT  | 10000                 |
| Calu-6     | WT               | KRAS(Q61K)  | 10000                 | Hs746.T        | WT  | WT  | 10000                 | SK-N-DZ(note) | WT  | WT  | 10000                 |
| HCC-2998   | WT               | KRAS(A146T) | 10000                 | HT             | WT  | WT  | 10000                 | SK-N-F1       | WT  | WT  | 10000                 |
| LS1034     | WT               | KRAS(A146T) | 10000                 | HT-3           | WT  | WT  | 10000                 | SKOV-3        | WT  | WT  | 10000                 |
| CHP-212    | WT               | NRAS(Q61K)  | 10000                 | HuNS-1         | WT  | WT  | 10000                 | SK-UT-1       | WT  | WT  | 10000                 |
| SK-N-AS    | WT               | NRAS(Q61K)  | 10000                 | IGROV1         | WT  | WT  | 10000                 | SN12C         | WT  | WT  | 10000                 |
| BFTC-905   | WT               | NRAS(Q61L)  | 10000                 | J82            | WT  | WT  | 10000                 | SNB-19        | WT  | WT  | 10000                 |
|            |                  |             |                       | JM1            | WT  | WT  | 10000                 | SNU-5         | WT  | WT  | 10000                 |
| Hu178      | WT               | WT          | 52                    | Kato III       | WT  | WT  | 10000                 | SNU-16        | WT  | WT  | 10000                 |
| RPIM-8226  | WT               | WT          | 263                   | KHOS-240S      | WT  | WT  | 10000                 | SNU-398       | WT  | WT  | 10000                 |
| BC-3       | WT               | WT          | 277                   | KM-12          | WT  | WT  | 10000                 | SNU-449       | WT  | WT  | 10000                 |
| ACHN       | WT               | WT          | 294                   | KPL-1          | WT  | WT  | 10000                 | SR            | WT  | WT  | 10000                 |
| JRT3-T35   | WT               | WT          | 295                   | KYSE-30        | WT  | WT  | 10000                 | ST486         | WT  | WT  | 10000                 |
| SK-MES-1   | WT               | WT          | 329                   | LNCaP          | WT  | WT  | 10000                 | SW579         | WT  | WT  | 10000                 |
| CESS       | WT               | WT          | 497                   | MC7-7          | WT  | WT  | 10000                 | SW684         | WT  | WT  | 10000                 |
| H4         | WT               | WT          | 619                   | MC-IXC         | WT  | WT  | 10000                 | SW-780        | WT  | WT  | 10000                 |
| BC-1       | WT               | WT          | 704                   | MDA-MB-175 VII | WT  | WT  | 10000                 | SW900         | WT  | WT  | 10000                 |
| DB         | WT               | WT          | 873                   | MDA-MB-468     | WT  | WT  | 10000                 | SW1088        | WT  | WT  | 10000                 |
| RPIM-6666  | WT               | WT          | 928                   | MiaPaCa        | WT  | WT  | 10000                 | SW1463        | WT  | WT  | 10000                 |
| MC/CAR     | WT               | WT          | 1002                  | Molt-4         | WT  | WT  | 10000                 | SW1990        | WT  | WT  | 10000                 |
| SNU-1      | WT               | WT          | 1501                  | NCI-ADR/RES    | WT  | WT  | 10000                 | T47D          | WT  | WT  | 10000                 |
| CEM/C1     | WT               | WT          | 1773                  | NCI-H69        | WT  | WT  | 10000                 | TE381.T       | WT  | WT  | 10000                 |
| GDM-1      | WT               | WT          | 1997                  | NCI-H82        | WT  | WT  | 10000                 | TK-10         | WT  | WT  | 10000                 |
| HT-1080    | WT               | WT          | 2004                  | NCI-H87        | WT  | WT  | 10000                 | U2OS          | WT  | WT  | 10000                 |
| HL-60      | WT               | WT          | 2178                  | NCI-H146       | WT  | WT  | 10000                 | U251          | WT  | WT  | 10000                 |
| C3A        | WT               | WT          | 5414                  | NCI-H157       | WT  | WT  | 10000                 | UACC-812      | WT  | WT  | 10000                 |
| MES-SA     | WT               | WT          | 6989                  | NCI-H187       | WT  | WT  | 10000                 | YAPC          | WT  | WT  | 10000                 |
| ZZRv1      | WT               | WT          | 10000                 | NCI-H209       | WT  | WT  | 10000                 | ZR-75-1       | WT  | WT  | 10000                 |
