# Supplementary material for: Dabrafenib; Preclinical Characterization, Increased Efficacy when Combined with Trametinib, while BRAF/MEK Tool Combination Reduced Skin Lesions
Source: PubMed Central journal article supplement (PMC3701070; doi:10.1371/journal.pone.0067583), 2013-07-03
Supplement: pone.0067583.s006.pdf [file pone.0067583.s006.pdf]

| <b>IC<sub>50</sub> (nM)</b>                    | <b>BRAF Tool Inhibitor</b> | <b>MEK Tool Inhibitor</b>   |
|------------------------------------------------|----------------------------|-----------------------------|
|                                                | GSK2366297A                | GSK2091975 (activated drug) |
| <b>BRAF Enzyme</b>                             | 0.20                       | >10000                      |
| <b>U-MEK Enzyme</b>                            | >10000                     | 4.4                         |
| <b>pERK<br/>(SK-MEL28)</b>                     | 2.0                        | 11                          |
| <b>A375 Cell Growth<br/>(gIC<sub>50</sub>)</b> | 9.5                        | 2.1                         |
